- complete and accurate reporting of studies of diagnostic accuracy: The STARD initiative. *BMJ* 2003; 326:41–4
19. The College of Emergency Medicine: Best Practice Guideline: Management of Pain in Adults. London, United Kingdom, The College of Emergency Medicine, 2014, p 12
  20. Benjamini Y, Hochberg Y: Controlling the False Discovery Rate: A practical and powerful approach to multiple testing. *J R Stat Soc Serie B Stat Methodol* 1995; 57:289–300
  21. Hochberg Y, Benjamini Y: More powerful procedures for multiple significance testing. *Stat Med* 1990; 9:811–8
  22. Esposito Vinzi V, Chin WW, Henseler J, Wang H: Handbook of Partial Least Squares: Concepts, Methods and Applications, Springer Handbooks of Computational Statistics Berlin, Germany, Springer, 2010, p 840
  23. Wold H: Partial least squares, *Encyclopedia of Statistical Sciences*, Vol 6. Edited by Kotz S, Johnson NL. New York, Wiley & Sons, 1985, pp 581–91
  24. Wold S, Sjöström M, Eriksson L: PLS-regression: A basic tool of chemometrics. *Chemometr Intell Lab Syst* 2001; 58:109–30
  25. Gélinas C, Chanques G, Puntillo K: In pursuit of pain: Recent advances and future directions in pain assessment in the ICU. *Intensive Care Med* 2014; 40:1009–14
  26. Bausewein C, Farquhar M, Booth S, Gysels M, Higginson IJ: Measurement of breathlessness in advanced disease: A systematic review. *Respir Med* 2007; 101:399–410
  27. Dudgeon DJ, Kristjanson L, Sloan JA, Lertzman M, Clement K: Dyspnea in cancer patients: Prevalence and associated factors. *J Pain Symptom Manage* 2001; 21:95–102
  28. Banzett RB, O'Donnell CR, Guilfoyle TE, Parshall MB, Schwartzstein RM, Meek PM, Gracely RH, Lansing RW: Multidimensional Dyspnea Profile: An instrument for clinical and laboratory research. *Eur Respir J* 2015; 45:1681–91
  29. Tortajada S: IC-RDOS calculator. 2015. Available at: <http://ic-rdos.com/>. Accessed July 7, 2015

## ANESTHESIOLOGY REFLECTIONS FROM THE WOOD LIBRARY-MUSEUM

### Fanny Davenport and the Doctors Rugg: 25-cent “Extracting, with Gas”

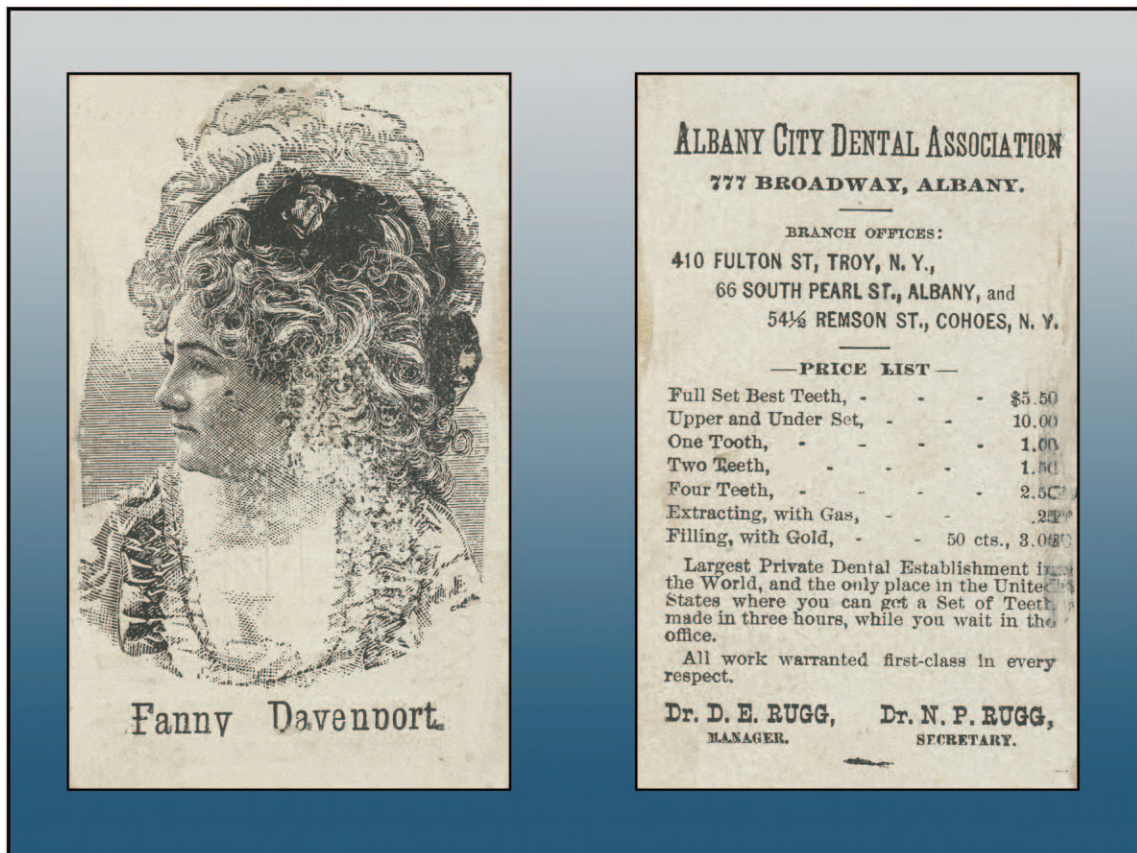

In August of 1879, the Doctors Rugg registered as dentists practicing at 777 Broadway in Albany, the capital city of the State of New York. In less than a decade the Ruggs were advertising (*right*) that their Albany City Dental Association (ACDA) was the “Largest Private Dental Establishment in the World.” Part of their successful advertising included distributing trade cards featuring Fanny Lily Gipsy Davenport (1850–1898). London-born and Boston-educated, Fanny Davenport (*left*) was a celebrated thespian for the final 36 of her abbreviated lifetime of only 48 years. Just 2 years her junior, the younger dentist, Dr. Newton P. Rugg (1852–1907), worked as ACDA’s secretary. His uncle and managing dental partner was Dr. Datus E. Rugg (1819–1898), a former blacksmith. ACDA’s patients were likely relieved to learn that the managing partner had traded in his forging hammer for nitrous oxide—and that “Extracting, with Gas” cost only 25 cents. (Copyright © the American Society of Anesthesiologists, Inc.)

George S. Bause, M.D., M.P.H., Honorary Curator, ASA’s Wood Library-Museum of Anesthesiology, Schaumburg, Illinois, and Clinical Associate Professor, Case Western Reserve University, Cleveland, Ohio. [UJYC@aol.com](mailto:UJYC@aol.com).
